# Supplementary material for: Identification of Key Small Non‐Coding MicroRNAs Controlling Pacemaker Mechanisms in the Human Sinus Node
Source: PubMed Central journal article supplement — J Am Heart Assoc. 2020 Oct 16;9(20):e016590. doi: 10.1161/JAHA.120.016590 (PMC7763385; doi:10.1161/jaha.120.016590), 2020-10-16
Supplement: JAH3-9-e016590-s001.pdf [file JAH3-9-e016590-s001.pdf]

# **SUPPLEMENTAL MATERIAL**

**Table S1. Human specimen information.**

| <b>Number</b> | <b>Age</b> | <b>Sex</b> | <b>Cause of death</b>    | <b>RNA amount (ng/<math>\mu</math>l) SN/RA</b> | <b>RNA quality (RIN) SN/RA</b> | <b>Use</b> |
|---------------|------------|------------|--------------------------|------------------------------------------------|--------------------------------|------------|
| 1             | 29         | M          | Road accident            | 100.60/231.90                                  | 6.1/7.6                        | qPCR       |
| 2             | 22         | M          | Road accident            | 30.98/301.40                                   | 8.0/7.7                        | qPCR       |
| 3             | 66         | M          | Suicide                  | 47.48/285.70                                   | 5.2/4.7                        | qPCR       |
| 4             | 19         | M          | Suicide                  | 114.11/389.00                                  | 6.4/7.2                        | qPCR       |
| 5             | 60         | M          | Sudden death             | 25.4/123.25                                    | 7.2/6.5                        | qPCR       |
| 6             | 54         | M          | Intracranial haemorrhage | 164.67/400.00                                  | 8.3/8.8                        | qPCR       |
| 7             | 42         | M          | Subarachnoid haemorrhage | 173.65/423.00                                  | 8.5/9.1                        | qPCR       |
| 8             | 19         | M          | Suicide                  | 114.11/389.00                                  | -                              | NGS        |
| 9             | 21         | M          | Suicide                  | 35.3/59.66                                     | -                              | NGS        |
| 10            | 54         | M          | Intracranial haemorrhage | 45.35/91.77                                    | -                              | NGS        |

- data not available but total RNA isolated from samples 8-10 passed their quality for NGS experiments

**Table S2. Summary of primary antibodies.**

| <b>Protein</b> | <b>Company</b> | <b>Catalogue #</b> | <b>Source</b> | <b>Dilution</b> |
|----------------|----------------|--------------------|---------------|-----------------|
| Cx43           | Millipore      | MAB3068            | Mono - Ms     | 1:50            |
| HCN4           | Alomone        | APC-052            | Poly - Rbt    | 1:50            |
| Caveolin3      | Transduction   | 310421             | Poly-Ms       | 1:50            |

**Table S3. Significantly up- or down- regulated miRs in the SN vs. RA. Mean relative miR expression and SEM in SN and RA, fold change and log fold change, and P values shown.**

| miR                    | SN mean         | SN SEM          | RA mean         | RA SEM          | Fold change      | Log fold change  | P value         |
|------------------------|-----------------|-----------------|-----------------|-----------------|------------------|------------------|-----------------|
| hsa-miR-1-3p           | 6.00E-02        | 3.00E-02        | 2.00E-01        | 8.00E-02        | -1.40E-01        | -5.00E-01        | 3.00E-02        |
| <b>hsa-miR-10a-5p</b>  | <b>1.00E-04</b> | <b>2.00E-05</b> | <b>3.00E-05</b> | <b>1.00E-05</b> | <b>3.50E-05</b>  | <b>3.60E-01</b>  | <b>5.00E-02</b> |
| hsa-miR-10b-5p         | 5.00E-02        | 2.00E-03        | 1.00E-02        | 1.00E-03        | 4.00E-02         | 8.90E-01         | 1.00E-03        |
| <b>hsa-miR-10b-3p</b>  | <b>1.00E-02</b> | <b>1.00E-02</b> | <b>2.00E-03</b> | <b>2.00E-03</b> | <b>5.34E-03</b>  | <b>5.70E-01</b>  | <b>1.00E-02</b> |
| hsa-miR-126-3p         | 3.41E+00        | 8.90E-01        | 7.65E+00        | 1.31E+00        | -4.24E+00        | -3.50E-01        | 4.00E-02        |
| hsa-miR-130b-3p        | 2.00E-03        | 1.00E-03        | 1.00E-02        | 1.00E-03        | -3.00E-03        | -4.00E-01        | 5.00E-02        |
| hsa-miR-130b-5p        | 3.00E-03        | 4.00E-04        | 1.00E-02        | 1.00E-03        | -3.00E-03        | -3.20E-01        | 2.00E-02        |
| hsa-miR-133a-3p        | 9.25E+00        | 1.77E+00        | 5.05E+01        | 1.13E+01        | -4.12E+01        | -7.40E-01        | 1.00E-03        |
| hsa-miR-133b           | 3.00E-02        | 8.00E-03        | 1.62E-01        | 6.20E-02        | -1.30E-01        | -7.10E-01        | 5.36E-02        |
| hsa-miR-139-5p         | 1.70E-01        | 3.00E-02        | 4.40E-01        | 6.00E-02        | -2.70E-01        | -4.10E-01        | 9.00E-03        |
| hsa-miR-148b-3p        | 3.00E-03        | 1.00E-03        | 2.00E-02        | 1.00E-02        | -2.00E-02        | -8.90E-01        | 4.00E-02        |
| <b>hsa-miR-153-3p</b>  | <b>2.00E-05</b> | <b>1.00E-05</b> | <b>4.00E-06</b> | <b>3.00E-06</b> | <b>1.00E-05</b>  | <b>5.90E-01</b>  | <b>5.00E-02</b> |
| hsa-miR-155-5p         | 2.00E-02        | 1.00E-02        | 4.00E-02        | 6.00E-03        | -2.00E-02        | -3.10E-01        | 5.00E-02        |
| hsa-miR-187-3p         | 3.00E-03        | 1.00E-03        | 4.00E-02        | 1.00E-02        | -4.00E-02        | -1.09E+00        | 1.00E-03        |
| <b>hsa-miR-193b-3p</b> | <b>2.00E-03</b> | <b>4.00E-04</b> | <b>1.00E-03</b> | <b>2.00E-04</b> | <b>1.00E-03</b>  | <b>3.40E-01</b>  | <b>2.00E-02</b> |
| <b>hsa-miR-198</b>     | <b>1.00E-03</b> | <b>3.00E-04</b> | <b>4.00E-04</b> | <b>3.00E-04</b> | <b>3.00E-04</b>  | <b>2.70E-01</b>  | <b>4.00E-02</b> |
| <b>hsa-miR-204-5p</b>  | <b>8.10E-01</b> | <b>2.10E-01</b> | <b>1.60E-01</b> | <b>3.00E-02</b> | <b>6.50E-01</b>  | <b>7.00E-01</b>  | <b>2.00E-03</b> |
| hsa-miR-210-3p         | 4.00E-02        | 1.00E-02        | 1.30E-01        | 3.00E-02        | -9.00E-02        | -5.10E-01        | 1.00E-02        |
| <b>hsa-miR-215-5p</b>  | <b>3.00E-03</b> | <b>1.00E-03</b> | <b>2.00E-04</b> | <b>1.00E-04</b> | <b>3.00E-03</b>  | <b>1.23E+00</b>  | <b>1.00E-03</b> |
| hsa-miR-218-5p         | 2.00E-04        | 4.00E-05        | 1.00E-03        | 2.00E-04        | -4.00E-04        | -4.40E-01        | 5.00E-02        |
| hsa-miR-22-3p          | 1.00E-02        | 3.00E-03        | 2.00E-02        | 2.00E-03        | -1.00E-02        | -3.70E-01        | 5.00E-03        |
| hsa-miR-27b-3p         | 1.00E-02        | 1.00E-03        | 1.00E-02        | 1.00E-03        | -6.00E-03        | -3.30E-01        | 6.00E-03        |
| hsa-miR-29b-3p         | 1.00E-03        | 3.00E-04        | 2.00E-03        | 2.00E-04        | -8.00E-04        | -3.10E-01        | 3.00E-02        |
| hsa-miR-30a-3p         | 2.90E-01        | 6.00E-02        | 5.20E-01        | 7.00E-02        | -2.30E-01        | -2.60E-01        | 3.00E-02        |
| hsa-miR-30a-5p         | 2.40E-01        | 6.00E-02        | 5.40E-01        | 7.00E-02        | -3.00E-01        | -3.50E-01        | 2.00E-02        |
| hsa-miR-30b-5p         | 9.10E-01        | 2.30E-01        | 2.35E+00        | 5.30E-01        | -1.43E+00        | -4.10E-01        | 3.00E-02        |
| hsa-miR-30c-5p         | 1.69E+00        | 4.30E-01        | 4.76E+00        | 1.14E+00        | -3.07E+00        | -4.50E-01        | 4.00E-02        |
| hsa-miR-30d-5p         | 8.00E-02        | 2.00E-02        | 1.90E-01        | 3.00E-02        | -1.10E-01        | -3.80E-01        | 1.00E-02        |
| hsa-miR-30e-3p         | 2.60E-01        | 6.00E-02        | 5.20E-01        | 7.00E-02        | -2.60E-01        | -3.00E-01        | 2.00E-02        |
| hsa-miR-342-5p         | 4.00E-04        | 2.00E-04        | 2.00E-03        | 1.00E-03        | -1.00E-03        | -5.80E-01        | 2.00E-02        |
| hsa-miR-363-5p         | 3.00E-07        | 1.00E-07        | 1.00E-05        | 7.00E-06        | -1.00E-05        | -1.56E+00        | 4.00E-02        |
| hsa-miR-371-3p         | 3.00E-05        | 1.00E-05        | 2.00E-04        | 8.00E-05        | -1.00E-04        | -7.60E-01        | 4.00E-02        |
| hsa-miR-372-3p         | 1.00E-03        | 3.00E-04        | 1.00E-02        | 3.00E-03        | -5.00E-03        | -9.60E-01        | 2.00E-02        |
| hsa-miR-373-3p         | 3.00E-05        | 2.00E-05        | 1.00E-04        | 2.00E-05        | -1.00E-04        | -4.60E-01        | 3.00E-03        |
| <b>hsa-miR-377-3p</b>  | <b>6.90E-01</b> | <b>1.00E-05</b> | <b>1.47E+00</b> | <b>4.00E-06</b> | <b>-7.80E-01</b> | <b>-3.30E-01</b> | <b>4.00E-02</b> |
| hsa-miR-377-5p         | 3.00E-05        | 5.20E-01        | 5.00E-06        | 5.40E-01        | 2.00E-05         | 7.60E-01         | 4.00E-02        |
| hsa-miR-378a-3p        | 3.00E-02        | 1.00E-02        | 6.00E-02        | 1.00E-02        | -3.00E-02        | -3.40E-01        | 2.00E-02        |
| <b>hsa-miR-378a-5p</b> | <b>4.00E-04</b> | <b>1.00E-04</b> | <b>1.00E-03</b> | <b>1.00E-04</b> | <b>-3.00E-04</b> | <b>-2.60E-01</b> | <b>5.00E-02</b> |
| hsa-miR-422a           | 3.00E-03        | 1.00E-03        | 1.00E-02        | 2.00E-03        | -5.00E-03        | -4.40E-01        | 2.00E-02        |
| hsa-miR-424-5p         | 1.00E-03        | 3.00E-04        | 3.00E-03        | 1.00E-03        | -2.00E-03        | -3.90E-01        | 3.00E-02        |
| hsa-miR-429            | 2.00E-04        | 2.00E-04        | 2.00E-03        | 1.00E-03        | -2.00E-03        | -9.10E-01        | 4.00E-02        |

| miR                    | SN mean         | SN SEM          | RA mean         | RA SEM          | Fold change     | Log fold change | P value         |
|------------------------|-----------------|-----------------|-----------------|-----------------|-----------------|-----------------|-----------------|
| hsa-miR-450b-5p        | 1.00E-04        | 1.00E-04        | 3.00E-04        | 1.00E-04        | -1.00E-04       | -3.60E-01       | 4.00E-02        |
| hsa-miR-483-3p         | 1.40E-02        | 4.00E-03        | 5.00E-02        | 1.00E-02        | -3.00E-02       | -5.10E-01       | 4.00E-03        |
| hsa-miR-486            | 6.00E-03        | 2.00E-03        | 1.00E-02        | 2.00E-03        | -7.00E-03       | -3.30E-01       | 5.00E-02        |
| hsa-miR-486-3p         | 3.00E-04        | 1.00E-04        | 1.00E-03        | 3.00E-04        | -8.00E-04       | -5.70E-01       | 1.00E-02        |
| hsa-miR-490-3p         | 9.00E-04        | 2.00E-04        | 1.00E-02        | 1.00E-03        | -4.00E-03       | -7.60E-01       | 4.00E-02        |
| <b>hsa-miR-512-5p</b>  | <b>1.83E+01</b> | <b>1.16E+01</b> | <b>1.00E-05</b> | <b>9.00E-06</b> | <b>1.83E+01</b> | <b>6.10E+00</b> | <b>3.00E-02</b> |
| hsa-miR-515-3p         | 3.00E-07        | 1.00E-07        | 3.00E-06        | 2.00E-06        | -3.00E-06       | -9.70E-01       | 4.00E-02        |
| hsa-miR-520d-3p        | 9.00E-05        | 4.00E-05        | 2.00E-04        | 3.00E-05        | -8.00E-05       | -2.70E-01       | 5.00E-02        |
| hsa-miR-520g-3p        | 6.00E-06        | 1.00E-05        | 0.00E+00        | 2.00E-05        | -3.00E-05       | -8.40E-01       | 5.00E-02        |
| hsa-miR-524-3p         | 5.00E-06        | 2.00E-06        | 4.00E-04        | 2.00E-04        | -4.00E-04       | -1.95E+00       | 4.00E-02        |
| <b>hsa-miR-548b-5p</b> | <b>1.00E-04</b> | <b>1.00E-04</b> | <b>1.00E-04</b> | <b>6.00E-05</b> | <b>6.00E-05</b> | <b>2.80E-01</b> | <b>4.00E-02</b> |
| <b>hsa-miR-548k</b>    | <b>2.00E-06</b> | <b>1.00E-06</b> | <b>0.00E+00</b> | <b>8.00E-08</b> | <b>2.00E-06</b> | <b>7.20E-01</b> | <b>5.00E-02</b> |
| hsa-miR-571            | 8.00E-05        | 2.00E-05        | 4.00E-04        | 2.00E-04        | -3.00E-04       | -6.60E-01       | 3.00E-02        |
| hsa-miR-584-5p         | 6.00E-04        | 1.00E-04        | 1.00E-03        | 1.00E-04        | -5.00E-04       | -2.70E-01       | 4.00E-02        |
| hsa-miR-616-5p         | 2.00E-04        | 4.00E-05        | 3.00E-04        | 4.00E-05        | -1.00E-04       | -2.60E-01       | 4.00E-02        |
| hsa-miR-628-3p         | 3.00E-03        | 1.00E-03        | 5.00E-03        | 1.00E-03        | -2.00E-03       | -2.70E-01       | 4.00E-02        |
| hsa-miR-642a-5p        | 3.00E-03        | 1.00E-03        | 3.00E-02        | 1.00E-02        | -2.00E-02       | -1.00E+00       | 4.00E-04        |
| hsa-miR-651-5p         | 2.00E-05        | 1.00E-05        | 4.00E-05        | 9.00E-06        | -2.00E-05       | -3.70E-01       | 4.00E-02        |
| <b>hsa-miR-654-5p</b>  | <b>1.00E-04</b> | <b>1.00E-04</b> | <b>4.00E-07</b> | <b>6.00E-08</b> | <b>1.00E-04</b> | <b>2.48E+00</b> | <b>3.00E-02</b> |
| <b>hsa-miR-668-3p</b>  | <b>5.00E-05</b> | <b>2.00E-05</b> | <b>4.00E-07</b> | <b>8.00E-08</b> | <b>5.00E-05</b> | <b>2.11E+00</b> | <b>3.00E-02</b> |
| <b>hsa-miR-885-3p</b>  | <b>1.00E-03</b> | <b>1.00E-03</b> | <b>4.00E-07</b> | <b>7.00E-08</b> | <b>1.00E-03</b> | <b>3.45E+00</b> | <b>2.00E-02</b> |
| hsa-miR-938            | 2.00E-06        | 1.00E-06        | 1.00E-05        | 1.00E-06        | -1.00E-05       | -6.60E-01       | 3.00E-03        |
| <b>hsa-miR-1225-3p</b> | <b>3.00E-02</b> | <b>1.00E-02</b> | <b>1.00E-02</b> | <b>1.00E-02</b> | <b>1.00E-02</b> | <b>3.10E-01</b> | <b>3.00E-02</b> |
| hsa-miR-1233-3p        | 5.00E-04        | 5.00E-04        | 5.38E+00        | 4.35E+00        | -5.38E+00       | -4.05E+00       | 3.00E-02        |
| <b>hsa-miR-1244-3p</b> | <b>3.00E-04</b> | <b>1.00E-04</b> | <b>1.00E-04</b> | <b>4.00E-05</b> | <b>2.09E-04</b> | <b>4.50E-01</b> | <b>1.00E-02</b> |

miRs with significant higher expression in SN highlighted in bold.
